# Supplementary material for: Efficient Role of Endophytic Aspergillus terreus in Biocontrol of Rhizoctonia solani Causing Damping-off Disease of Phaseolus vulgaris and Vicia faba
Source: MDPI journal article supplement (doi:10.3390/microorganisms11061487), 2023-06-02
Supplement: s1 [file s1]

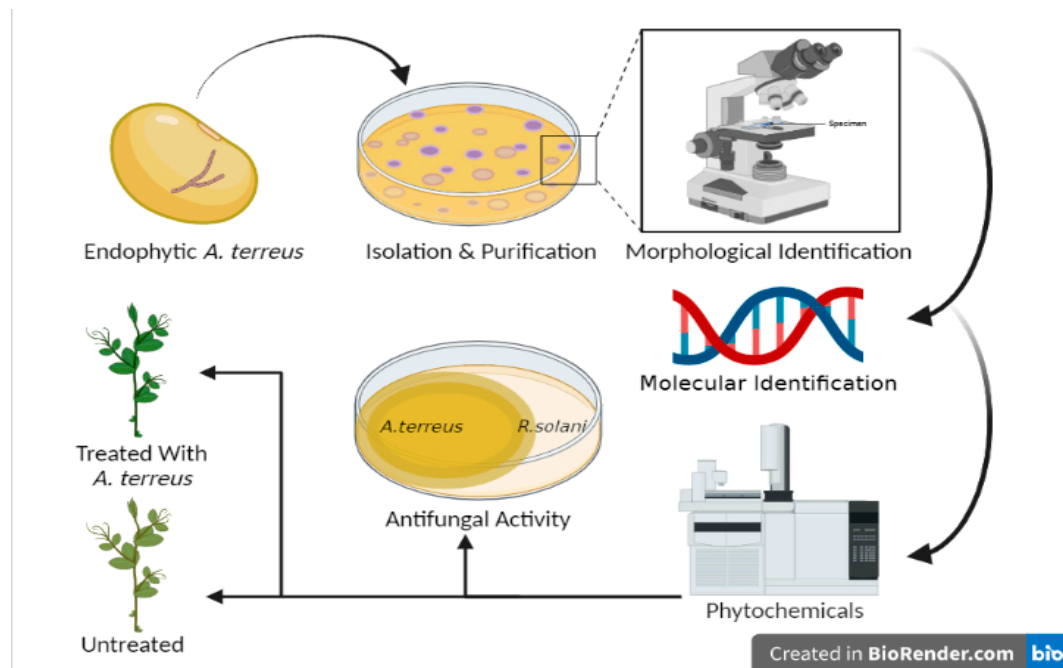

**Figure S1.** Schematic diagram showing isolation of seed-borne endophytic *Aspergillus terreus*, antifungal activity and plant growth promoting induced by treatment with *Aspergillus terreus*.
